# Supplementary material for: Synthesis of high molecular weight polyglycolide in supercritical carbon dioxide
Source: Royal Society of Chemistry journal article supplement (doi:10.1039/c4ra06815g), 2014-07-29

## Synthesis of high molecular weight polyglycolide in supercritical carbon dioxide

Christian Schmidt, Marc Behl, Andreas Lendlein, Sabine Beuermann\*

### Supporting Information

#### Nuclear Magnetic Resonance (NMR) Spectroscopy

$^1\text{H}$ -NMR-spectra of the polymer were recorded with an AVANCE III 600 MHz spectrometer (Bruker). The chloroform-d ( $\text{CDCl}_3$ , Aldrich, 99.5%) peak at  $\delta = 7.26$  ppm was utilized as internal standard. The samples were prepared as follows: PGA (20 mg) was heated in HFIP (0.15 mL) at 55 °C for 2 hours.  $\text{CDCl}_3$  (0.4 mL) was added to the clear solution and mixed until a homogenous solution was obtained.

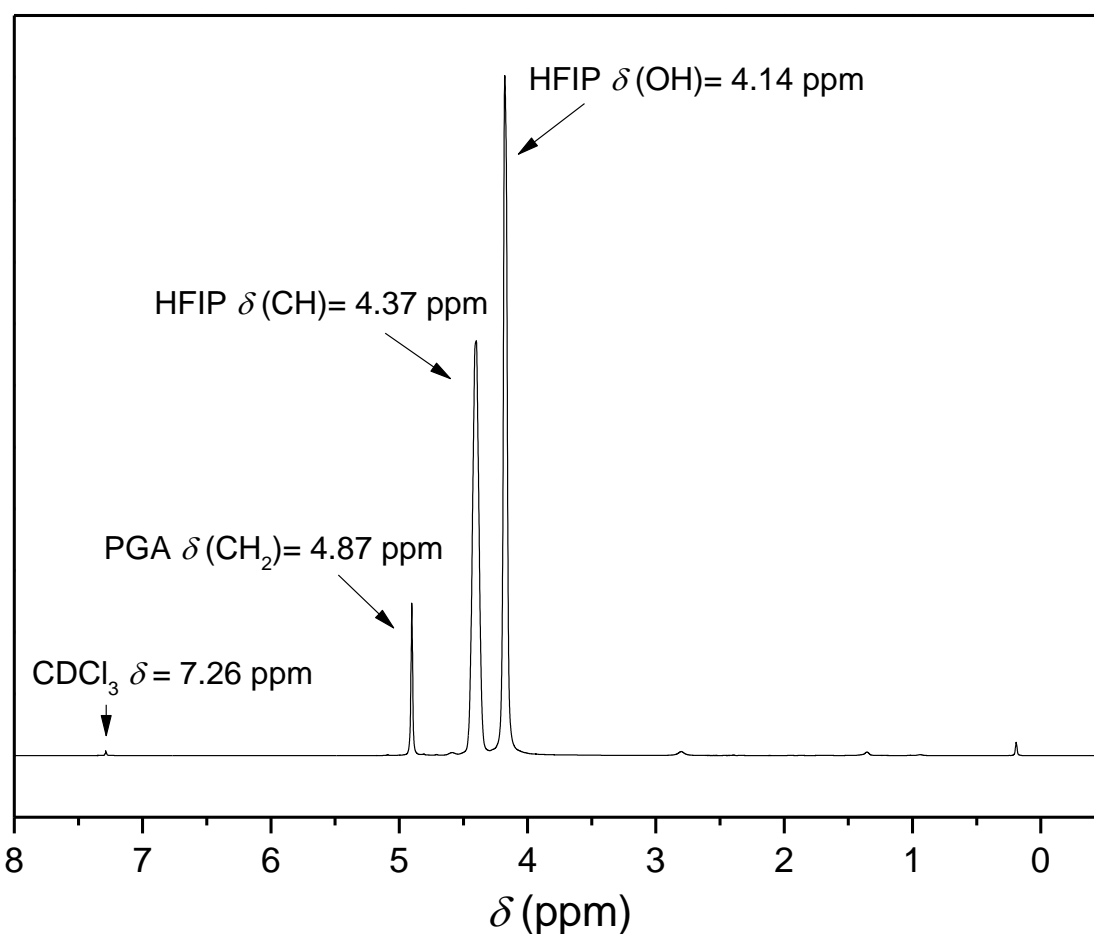

Supplement: c4ra06815g1.pdf [file c4ra06815g1.pdf]
